# Supplementary material for: Transcriptome and ultrastructural changes in dystrophic Epidermolysis bullosa resemble skin aging
Source: publisher site journal article supplement (doi:10.18632/aging.100755), 2015-06-14
Supplement: Supplementary file [file aging-v7i6-100755-supplementary-material-SD1.pdf]

## SUPPLEMENTARY INFORMATION

Please browse the full text version of this manuscript to see the Supplementary Table.

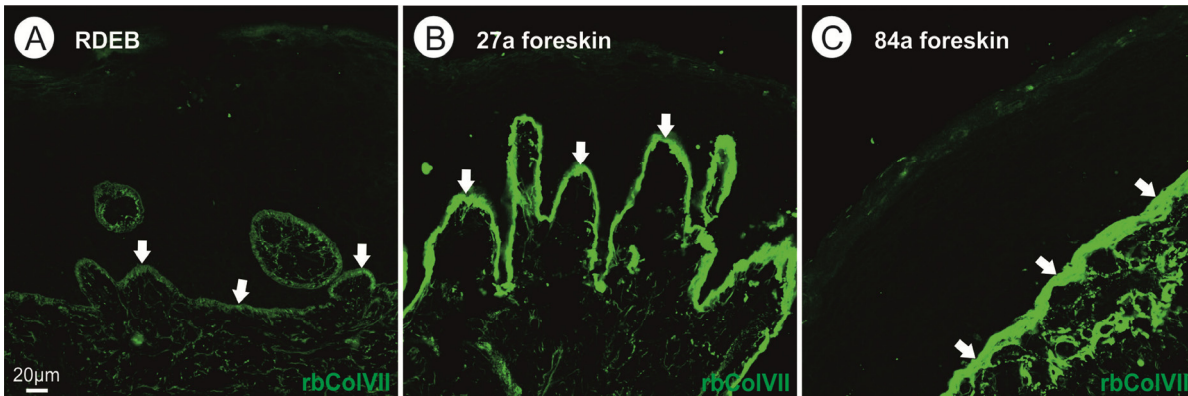

**Supplementary Figure 1.** (A) Detection of type VII collagen protein with the rabbit polyclonal anti type VII collagen serum visualized a faint type VII collagen labeling at the epidermal-dermal junction (arrows) in RDEB patients compared to a strong immunoreactivity in (B) the middle aged and (C) aged skin tissue. Please compare this result with Fig. 2M and see discussion in text.
